# Supplementary material for: Aspirin Use and Risk of Hepatocellular Carcinoma in a National Cohort Study of Korean Adults
Source: PubMed Central journal article supplement (PMC5862896; doi:10.1038/s41598-018-23343-0), 2018-03-21
Supplement: 41598_2018_23343_MOESM1_ESM.pdf [file 41598_2018_23343_MOESM1_ESM.pdf]

**Aspirin Use and Risk of Hepatocellular Carcinoma in a National Cohort Study of Korean Adults**

In Cheol Hwang, Jooyoung Chang, Kyuwoong Kim, Sang Min Park

### Supplemental Table 1

Risk of HCC in aspirin users compared with aspirin non-users in a 1:1 propensity score matched cohort\*

|                     | Aspirin non-users<br>(<30 DDDs) | Aspirin users<br>(≥30 DDDs) |
|---------------------|---------------------------------|-----------------------------|
| No. of participants | 75,248                          | 75,248                      |
| No. of HCC          | 294                             | 279                         |
| Person-years        | 214,945                         | 237,776                     |
| HR (95% CI)         | 1 (reference)                   | 0.86 (0.73–1.01)            |

**Abbreviations:** HCC = hepatocellular carcinoma; DDD = defined daily dose; HR = hazard ratio; CI = confidence interval.

\*Matched for age, sex, body mass index, cigarette smoking, alcohol consumption, physical activity, blood pressure, fasting serum glucose, Charlson comorbidity index, statin use, and metformin use.

## Supplemental Table 2

Risk of death in aspirin users compared with aspirin non-users

|                     | Aspirin non-users<br>( $<30$ DDDs) | Aspirin users<br>( $\geq 30$ DDDs) |
|---------------------|------------------------------------|------------------------------------|
| No. of participants | 395,973                            | 64,782                             |
| No. of death        | 15,891                             | 5,827                              |
| Person-years        | 62,547                             | 22,475                             |
| HR* (95% CI)        | 1 (reference)                      | 0.99 (0.95–1.02)                   |

**Abbreviations:** HCC = hepatocellular carcinoma; DDD = defined daily dose; HR = hazard ratio; CI = confidence interval.

\*Adjusted for age, sex, body mass index, cigarette smoking, alcohol consumption, physical activity, blood pressure, fasting serum glucose, Charlson comorbidity index, statin use, and metformin use.
